# Supplementary material for: Fluctuation of Global Gene Expression by Endogenous miRNA Response to the Introduction of an Exogenous miRNA
Source: PubMed Central journal article supplement (PMC3709726; doi:10.3390/ijms140611171), 2013-05-27
Supplement: ijms-14-11171-s002.pdf [file ijms-14-11171-s002.pdf]

## Supplementary Information

**Table S1.** Synthesized oligonucleotides for miRNA duplexes.

| Duplex           | One strand  | Sequence *              | Opposite strand | Sequence *               |
|------------------|-------------|-------------------------|-----------------|--------------------------|
| <b>let-7b</b>    | let-7b-5p   | UGAGGUAGUAGGUUGUGUGGUU  | let-7b-3p       | CUAUACAACCUACUGCCUUCCC   |
| <b>miR-1</b>     | miR-1-5p    | UGGAAUGUAAAGAAGUAUGUAU  | miR-3p          | ACAUACUUCUUUAUAUGCCCAUA  |
| <b>miR-21</b>    | miR-21-5p   | UAGCUUAUCAGACUGAUGUUGA  | miR-21-3p       | CAACACCAGUCGAUGGGCUGU    |
| <b>miR-22</b>    | miR-22-3p   | AAGCUGCCAGUUGAAGAACUGU  | miR-22-5p       | AGUUCUUCAGUGGCAAGCUUUA   |
| <b>miR-28</b>    | miR-28-5p   | AAGGAGCUCACAGUCUAUUGAG  | miR-28-3p       | CACUAGAUUGUGAGCUCCUGGA   |
| <b>miR-30c-1</b> | miR-30c-5p  | UGUAAACAUCCUACACUCUCAGC | miR-30c-1-3p    | CUGGGAGAGGGUUGUUUACUCC   |
| <b>miR-186</b>   | miR-186-5p  | CAAAGAAUUCUCCUUUUGGGCU  | miR-186-3p      | GCCCAAAGGUGAAUUUUUUGGG   |
| <b>miR-199b</b>  | miR-199b-3p | ACAGUAGUCUGCACAUUGGUUA  | miR-199b-5p     | CCCAGUGUUUAGACUAUCUGUUC  |
| <b>miR-200b</b>  | miR-200b-3p | UAAUACUGCCUGGUAUGAUGA   | miR-200b-5p     | CAUCUACUGGGCAGCAUUGGA    |
| <b>miR-330</b>   | miR-330-5p  | UCUCUGGGCCUGUGUCUUAGGC  | miR-330-3p      | GCAAAGCACACGGCCUGCAGAGA  |
| <b>miR-335</b>   | miR-335-5p  | UCAAGAGCAAUAACGAAAAAUG  | miR-335-3p      | UUUUUCAUUAUUGCUCUCCUGACC |
| <b>miR-346</b>   | miR-346-5p  | UGUCUGCCCGCAUGCCUGCCUCU | miR-346-3p      | AGGCAGGGGCUGGGCCUGCAGC   |
| <b>miR-466</b>   | miR-466-5p  | AUACACAUCACGCAACACACAU  | miR-466-3p      | GUGUGUUGCAUGUGUGUAUAUGU  |
| <b>miR-574</b>   | miR-574-5p  | UGAGUGUGUGUGUGAGUGUGU   | miR-574-3p      | CACGCUCAUGCACACACCCACA   |
| <b>miR-3126</b>  | miR-3126-5p | UGAGGGACAGAUGCCAGAAGCA  | miR-3126-3p     | CAUCUGGCAUCCGUCACACAGA   |
| <b>miDNA</b>     | miDNA       | taatactgcctggtaatgatga  | miDNA *         | catcttactgggcagcattgga   |

\* Upper character indicates RNA. Lower character, DNA. s\* indicates miRNA strand which is not assigned in miRBase.

**Table S2.** Oligonucleotide sequences for construction of miRNA target reporters. Each oligonucleotide contains completely matched target sequence of each miRNA (22 nt) with 2 nt excessive sequences (upper cases) at both ends, and the overhang sequence of restriction enzyme (4 nt, lower cases) at 5' end.

|                    | Sense strand                   | Antisense strand               |
|--------------------|--------------------------------|--------------------------------|
| let-7b-5p target   | tcgaGAAACCACACAACCTACTACCTcacc | aattGGTGAGGTAGTAGGTTGTGTGGtttc |
| miR-21-5p target   | tcgaAGTCAACATCAGTCTGATAAGCtacc | aattGGTAGCTTATCAGACTGATGTTgact |
| miR-200b-3p target | tcgaCGTCATCATTACCAGGCAGTATtaga | aattTCTAATACTGCCTGGTAATGATgacg |
| miR-330-5p target  | tcgaGAGCCTAAGACACAGGCCAGAgagg  | aattCCTCTCTGGGCCTGTGTCTTAGgctc |

**Table S3.** qRT-PCR was carried out using the Forward and the Reverse primers.

| Gene name | Forward primer (5'→3')  | Reverse primer (5'→3')  |
|-----------|-------------------------|-------------------------|
| HDHD1A    | GACGGACTTCTTCTGGATACTG  | CCATAACCAGGGACTTTACATC  |
| UBQLN1    | CAGCTACAGAATCCAGAAGTCAG | CCCAGTAACCTTTCAATAGCTG  |
| PBX2      | GGAGGCAAACATCTATGCTG    | CCAGATCCTGAGAGATTGAAAG  |
| ZC3H11A   | CAGTCCTCTTCAGATTCCCTCAC | AAATCATCCTCCACAGAGAGTG  |
| SKA2      | CCAGGTTCAAGCAGTTCTCTG   | GGATCACCATCAGGAGTTAAAG  |
| CASP7     | ATCAGGGCTGTATTGAAGAGC   | TACTGAAGAGGGACGGTACAAAC |
| SLC11A2   | CTTGGTCCTTATCATCTGTTC   | CAACCCAAGTAGAACACAAAGC  |
| UBR3      | CGACTAAATAGCTGTCCTTTCC  | ACCACACTTACAAATGGTCTGG  |
| RARG      | ATCAGCACTAAGGGAGCTGAAAG | CTCAAACATTTTCAGGGTTCTCC |
| SPAST     | GTGAAGAATATGTCTGCCAGTG  | CTTCTAAAGTTTGAGGGCTGAC  |
| METTL7A   | CTATTTTCATGGAGCATGTGG   | AGCTCTCTCTGGTCAGGTTG    |
| SEC23A    | CGGTTCTTCTTGATAGCAGTAGC | CATATCCTGGTATCCTGACTTCC |
| HMGN4     | GCTCGGTTGTCTGCTAAACC    | CTTTCAGCATCTGCTTTCC     |
| ZNF652    | GAGTAAGGAAATGCTTCTCACC  | GTAAGTACAGAGAGGGAGCAC   |
| SLC39A1   | GTCACCTCTGGAGGAAACAAG   | CAGGGAGAACCACAGTACACAG  |
| OTUD4     | TTCAGCCATCCTAGAACTAGC   | ACACTAGAGTGGACCTTGCTTAG |
| USP37     | CCTAACACCAGATTCAAGTCAC  | CTTGCAAGAGTGCATTACTCAG  |
| AP1S2     | TGAGCACTGTCTTATCACATCG  | CAGCAGCTCTGCATAGTTTGAC  |
| OSTM1     | TCAAGAGATCCTCCTGCCTTAG  | CCAAGTACTCTGGGCTACAC    |
| SHCBP1    | CAAGGAAGGGATCCTCATTAAG  | TCACCAAGACAACACCATAACC  |
| PGM2L1    | CTACCTTCCAAGTGAGTCACAAC | CCTCACCATACATAGAAGCAGAG |
| TOMM34    | TCAGAAGAGGTGGAATTCCTTG  | TTGCCTTCTTCCTCAGAACTC   |
| SPRYD3    | GTCTGTGGCTTATCATGCAGAC  | ATTCCACAGCCCATGATGTC    |
| SRPR      | TCAAAGAGCTTGAGTCGTGAAG  | CAACAGATTCACAGAGCTGGAC  |
| B4GALT1   | GGGAGTTGTGGGAAATAAGAAG  | AAGTTACCACTCAGGGCATTG   |
| SLC7A11   | GCATCTGCTACCTTTGAGAGTG  | CTGCCATAACCAGAAAGCTC    |
| NHLRC3    | CAGGTTTACTCCTGATGGGAAG  | TGATCTGCTAGTTGGATTGTGC  |
| CLDN12    | GTACTCCCATCCACCCAGTATG  | CCCATTAAGTGGTGTGTGAAAC  |
